# Supplementary material for: Crosslinking proteins modulate the self-organization of driven systems
Source: Royal Society of Chemistry journal article supplement (doi:10.1039/c3sm50506e), 2013-01-01
Supplement: c3sm50506e.pdf [file c3sm50506e.pdf]

# Crosslinking proteins modulate the self-organization of driven systems

## SUPPLEMENTAL MATERIAL

20. Mai 2013

Volker Schaller,<sup>a</sup> Kurt M. Schmoller,<sup>a,b</sup> Esra Karaköse,<sup>c</sup> Benjamin Hammerich,<sup>a</sup> Matthias Maier,<sup>a</sup> and Andreas R. Bausch<sup>a</sup>

### 1. Supplemental Figure

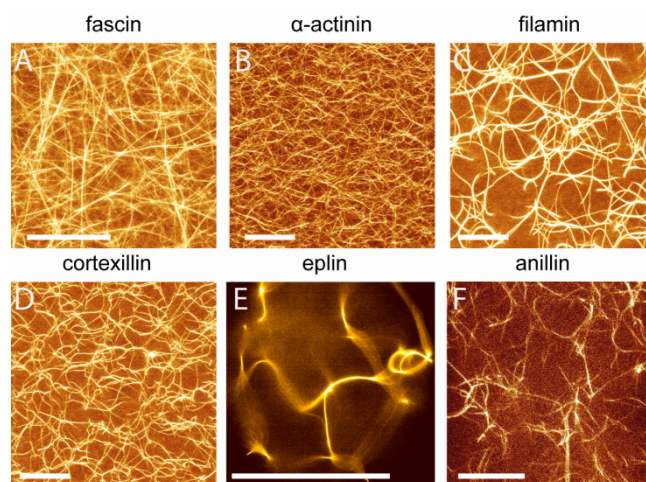

Supplemental Figure S1. **Typical network structures for the different crosslinking proteins.**

**A:** Fascin forms networks consisting of bundles of crosslinked actin filaments.

**B:**  $\alpha$ -actinin forms homogenous actin-networks formed by tight bundles in kinetically trapped networks.

**C:** Filamin forms networks that are characterized by a coexistence of kinetically trapped bundles and clusters at high crosslinker concentrations.

**D:** Cortexillin forms anti-parallel bundle networks

**E:** Eplin bundles actin filaments to form extended bundle networks.

**F:** Anillin, like  $\alpha$ -actinin and filamin, forms bundled *in vitro* networks.

All scalebars are 50 $\mu$ m.

<sup>a</sup> Lehrstuhl für Biophysik-E27, Technische Universität München, James-Frank-Straße 1, 85748 Garching, Germany; E-mail: abausch@mytum.de

<sup>b</sup> present address: Department of Biology, Stanford University, Stanford, CA 94305, USA

<sup>c</sup> Max Planck Institute of Biochemistry, Am Klopferspitz 18, 82152 Martinsried, Germany

## 2. Video Captions

**Movie 1: Fascin leads to the self-organized formation of polar structures.** For the ring formation the actin density was set to  $3\mu\text{M}$  and the crosslinker density was  $0.2\mu\text{M}$ . For the fibre formation the actin density was set to  $10\mu\text{M}$  and the fascin concentration was adjusted to  $0.5\mu\text{M}$ .

**Movie 2:  $\alpha$ -actinin networks that are set under stress by motor proteins are unstable and phase separate into dilute regions and contractile patches.** The actin concentration was set to  $7.6\mu\text{M}$  and the crosslinker concentration was  $0.2\mu\text{M}$ .

**Movie 3:  $\alpha$ -EPLIN networks undergo a similar phase-separation like  $\alpha$ -actinin networks – however, with a smaller structure size.** The actin concentration was adjusted to  $7.6\mu\text{M}$  and the  $\alpha$ -EPLIN was  $0.046\mu\text{M}$ .

**Movie 4: The addition of Anillin leads to the formation of apolar bundles that are barely transported by the underlying motor proteins.** The actin concentration was adjusted to  $7.6\mu\text{M}$  and the anillin concentration was  $0.2\mu\text{M}$ .
